# Supplementary material for: Preparation, Characterization, and Performance Evaluation of Polysulfone Hollow Fiber Membrane with PEBAX or PDMS Coating for Oxygen Enhancement Process
Source: PubMed Central journal article supplement (PMC6414963; doi:10.3390/polym10020126), 2018-01-28
Supplement: polymers-10-00126-s001.pdf [file polymers-10-00126-s001.pdf]

# Preparation, Characterization and Performance Evaluation of Polysulfone Hollow Fiber Membrane with PEBA<sub>X</sub> or PDMS Coating for Oxygen Enhancement Process

Kok Chung Chong <sup>1,\*</sup>, Soon Onn Lai <sup>1</sup>, Woei Jye Lau <sup>2,\*</sup>, Hui San Thiam <sup>1</sup>, Ahmad Fauzi Ismail <sup>2</sup> and Rosyiela Azwa Roslan <sup>2</sup>

<sup>1</sup> Lee Kong Chian Faculty of Engineering and Science, Universiti Tunku Abdul Rahman, Jalan Sungai Long, Bandar Sungai Long, 43300 Kajang, Malaysia; laiso@utar.edu.my (S.O.L.); thiamhs@utar.edu.my (H.S.T.)

<sup>2</sup> Advanced Membrane Technology Research Centre (AMTEC), Universiti Teknologi Malaysia, 81310 Skudai, Johor, Malaysia; afauzi@utm.my (A.F.M.); rosyielazwa.roslan@yahoo.com (R.A.R.)

\* Correspondence: chongkc@utar.edu.my (K.C.C.); lwoeijye@utm.my (W.J.L.); Tel.: +60-3-9086-0288(K.C.C.); +60-7-553-6122(W.J.L.)

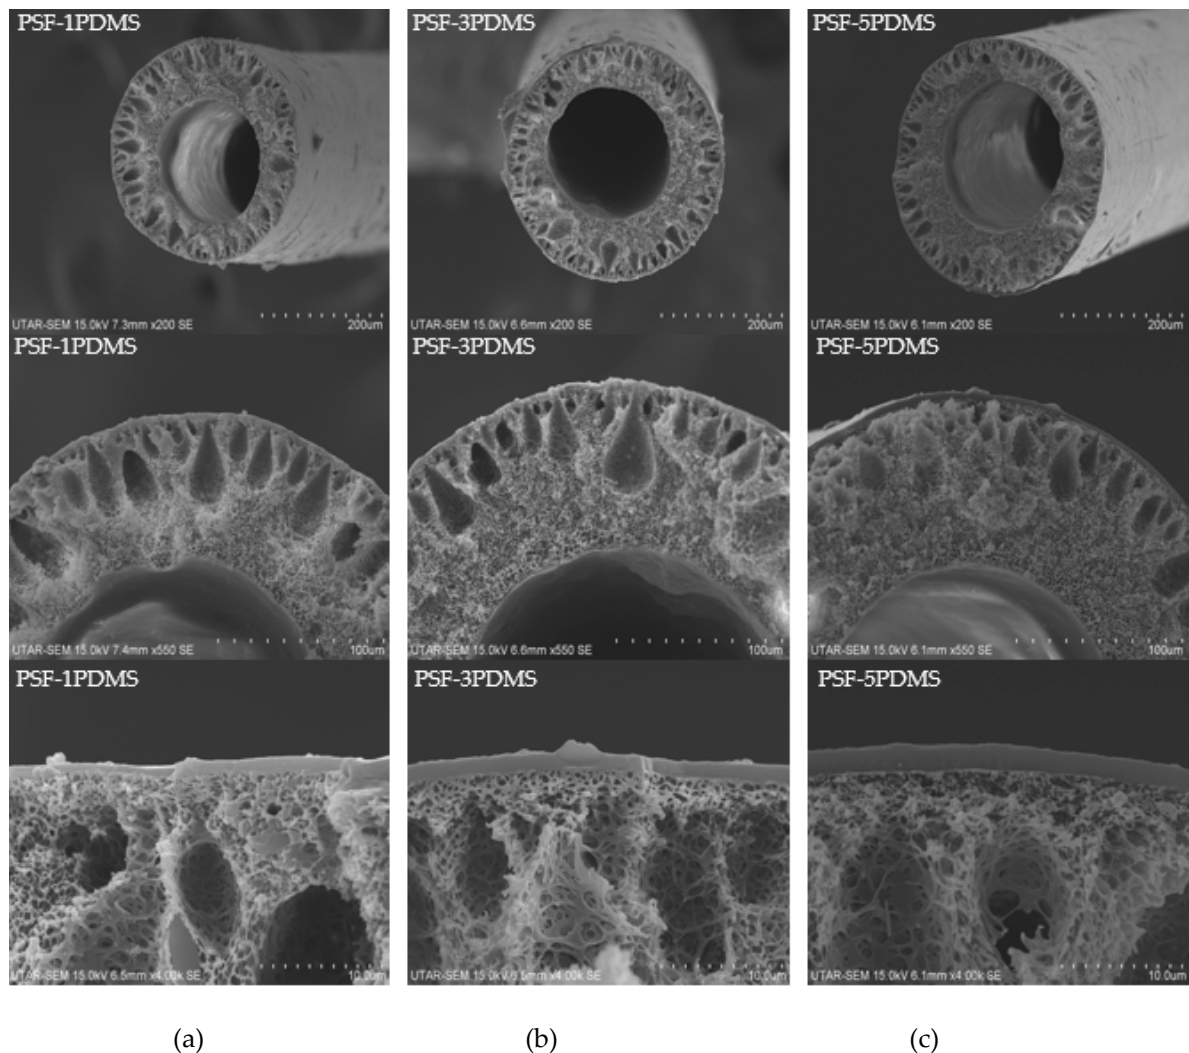

**Figure S1.** Cross sectional SEM image of PSF membrane coated with PDMS concentration of (a) 1 wt %, (b) 3 wt % and (c) 5 wt %.

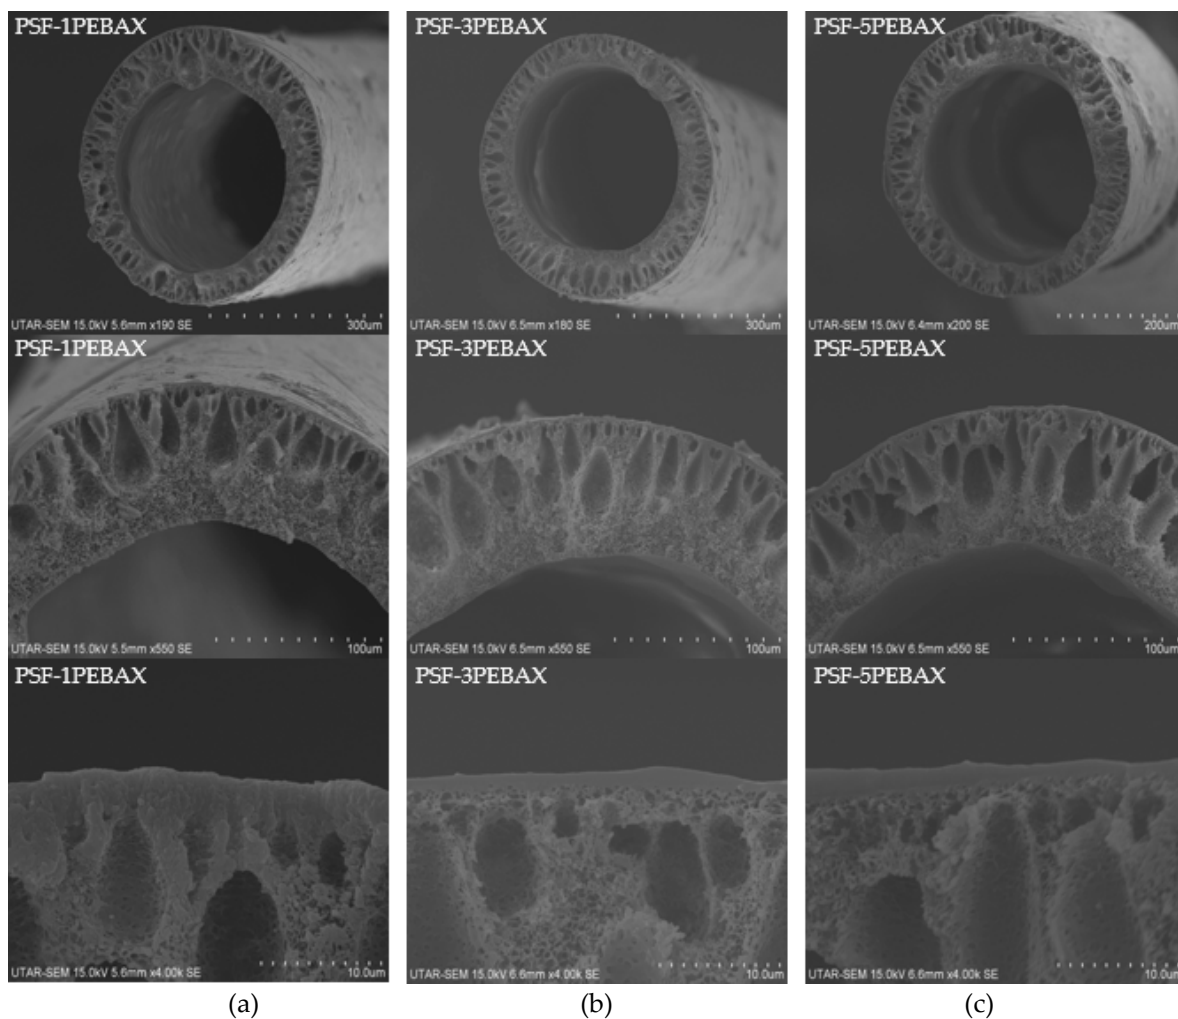

**Figure S2.** Cross sectional SEM image of PSF membrane coated with PEBAX at concentration of (a) 1 wt %, (b) 3 wt % and (c) 5 wt %.

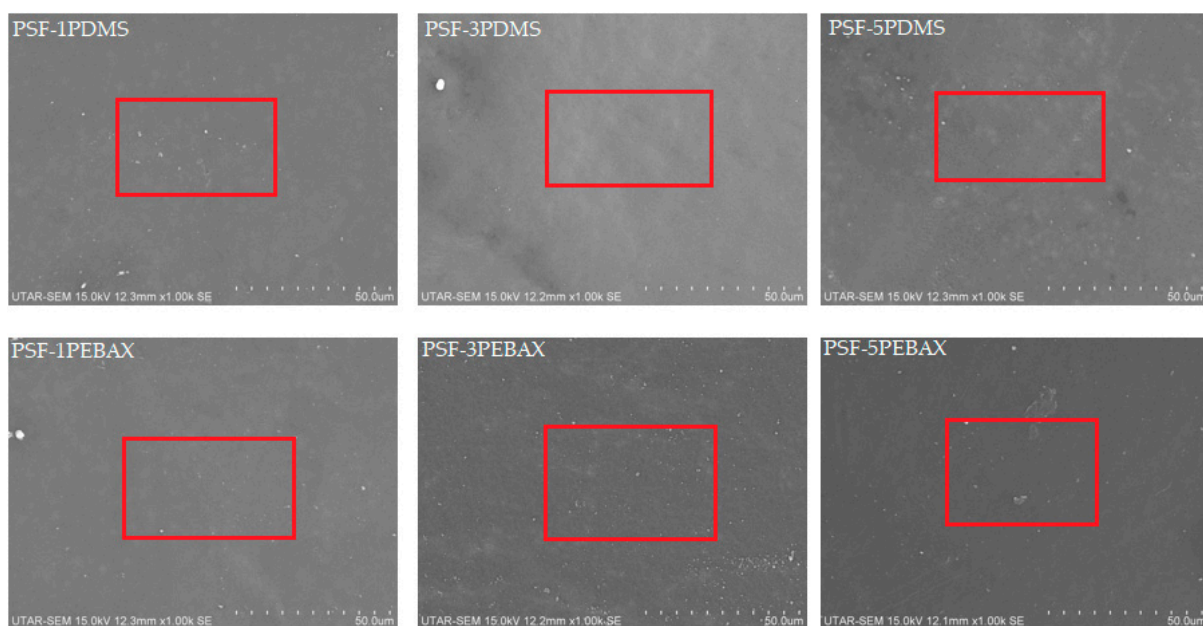

**Figure S3.**EDX surface marking for PSF membrane coated with PDMS and PEBAX.
